# Supplementary material for: p66Shc: A novel biomarker of tubular oxidative injury in patients with diabetic nephropathy
Source: PubMed Central journal article supplement (PMC4932503; doi:10.1038/srep29302), 2016-07-05
Supplement: srep29302-s1.pdf [file srep29302-s1.pdf]

# **p66Shc: A novel biomarker of tubular oxidative injury in patients with diabetic nephropathy**

XiaoxuanXu<sup>1,3</sup>, Xuejing Zhu<sup>1</sup>, Mingming Ma<sup>1</sup>, Yachun Han<sup>1</sup>, Chun Hu<sup>1</sup>, Shuguang Yuan<sup>1</sup>, Yuan  
Yang<sup>1</sup>, Li Xiao<sup>1</sup>, Fuyou Liu<sup>1</sup>, Yashpal S. Kanwar<sup>2</sup>, Lin Sun<sup>1</sup>

XiaoxuanXu and Xuejing Zhu contributed equally to this work.

<sup>1</sup>Department of Nephrology, <sup>2</sup><sup>nd</sup>Xiangya Hospital, Central South University, Changsha, Hunan,  
China;

<sup>2</sup>Departments of Pathology & Medicine, Northwestern University, Chicago, USA

<sup>3</sup>Present address: Health Management Center, Xiangya Hospital, Central South University,  
Changsha, Hunan, China

**Running title:** p66Shc expression in diabetic nephropathy patients

**Key words:** p66Shc, Diabetic nephropathy, ROS, renal pathology, tubulo-interstitial lesions

## ***Correspondence address:***

Lin SUN, MD, Ph.D  
Department of Nephrology  
Second Xiangya Hospital  
Central South University  
NO 139,Remin Road  
Changsha, Hunan, P.R.China, 415800  
Tel: 86-731-8529-2064  
E-mail: zndxsunlin11@163.com

Suppl. Fig 1

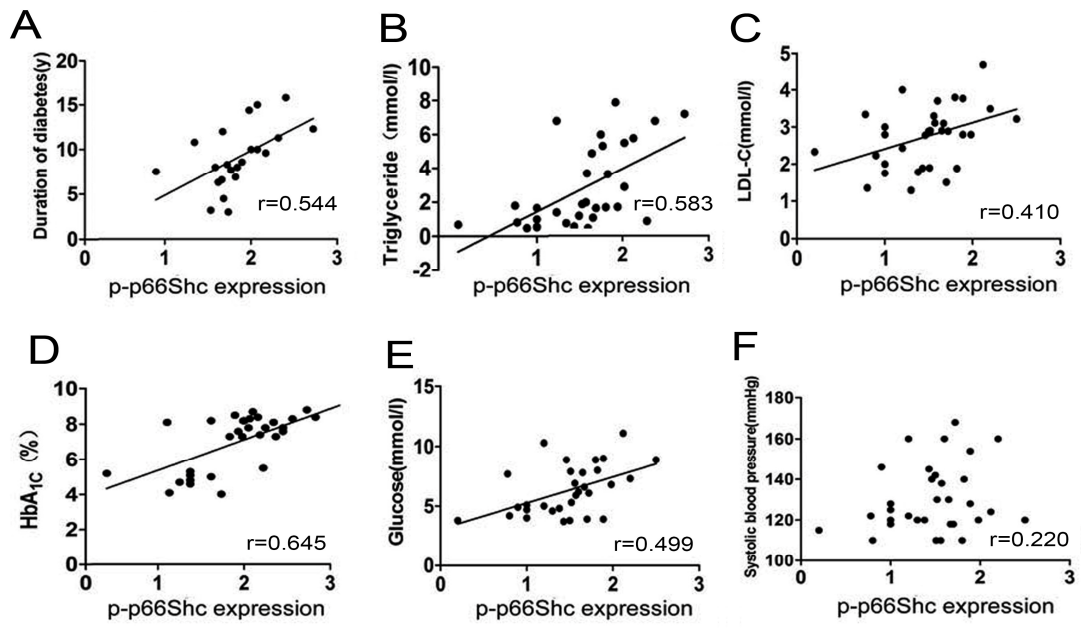

## Suppl. Fig 2

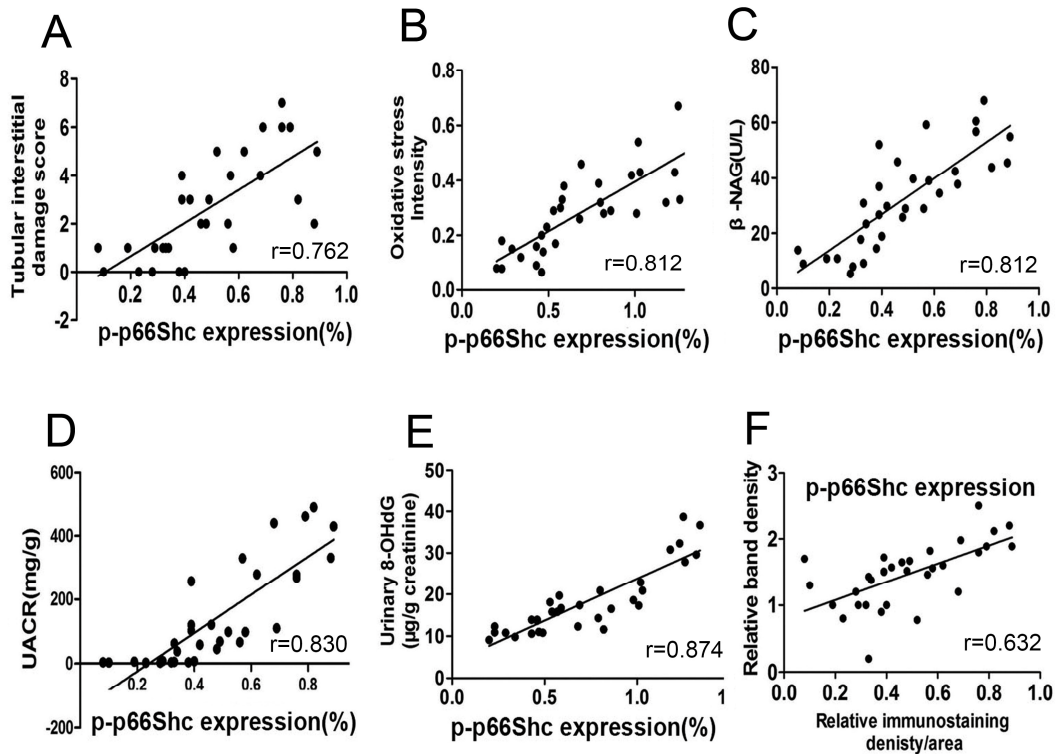

## Supplementary figure legends

### Suppl. Fig 1. The correlation analysis between phosphorylation of p66Shc (p-pShc) expression levels in PBM and various clinical characteristics in DN patients . A.

Correlation analysis between the expression level of p66Shc in PBMs of patients with DN and duration of diabetes(A)( $r=0.544, p<0.01$ ), triglyceride (B) ( $r=0.583, p<0.01$ ), LDL-C (C) ( $r=0.410, p<0.01$ ), HbA1C (D) ( $r=0.645, p<0.01$ ), blood glucose (E) ( $r=0.499, p<0.01$ ) and SBP (F) ( $r=0.220, p>0.05$ ). Values are means  $\pm$  E. r: Correlation coefficient.

**Suppl. Fig 2. The correlation of p-p66Shc expression in the kidney and the clinical indicators in DN patients.** A. Correlative analysis revealed that the p-p66Shc expression in renal tissues of DN patients and tubular interstitial damage score were positively correlated ( $r=0.762$ ,  $p<0.01$ ). B. The p-p66Shc expression levels and the kidney oxidative stress were also positively correlated ( $r=0.812$ ,  $P<0.01$ ). C. positive correlation was observed in the expression of p66Shc and urine  $\beta$ -NAG level ( $r=0.812$ ,  $P<0.01$ ). Likewise was case for the concentration of UACR (D) and urine 8-OHdG levels (E) and the p66Shc expression ( $r=0.830$ ,  $P<0.01$ ,  $r=0.874$ ,  $P<0.01$ , respectively). F. The analysis of the correlation between the expression p66Shc in kidney and PBMs is shown ( $r=0.632$ ,  $P<0.01$ ). Values are means  $\pm$  E. r: Correlation coefficient.
